# Supplementary material
Source: Springer Nature journal article supplement (https://www.springermedizin.de/resource/supplementary/12916_2012_718_MOESM9_ESM.pdf/9598740)

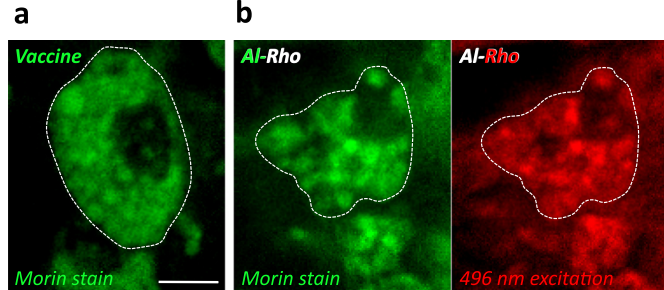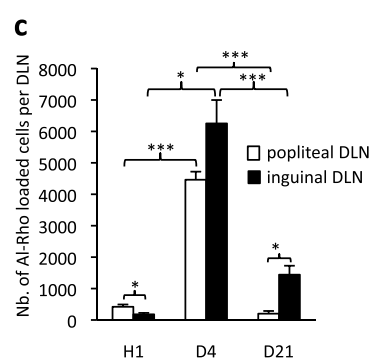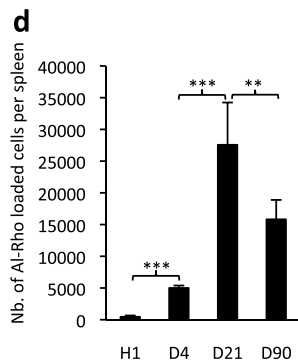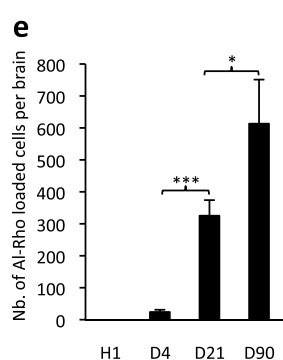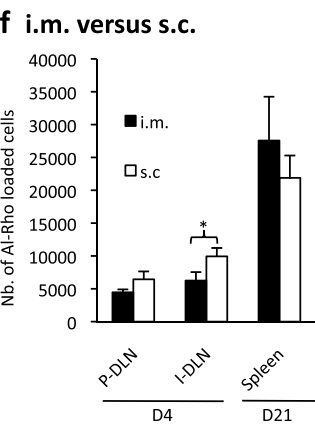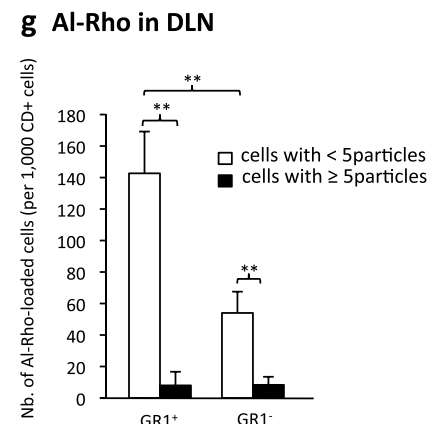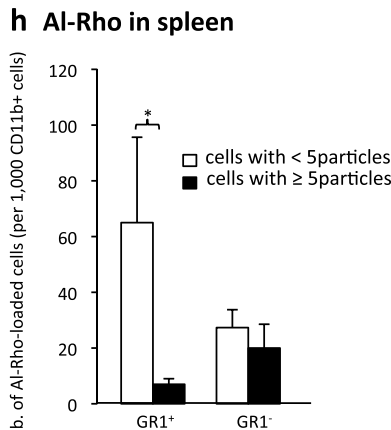

Supplement: MOESM9 [file 9598740]
